# Supplementary material for: Open or Not Open the Retroperitoneum: A Pandora’s Box for High-grade Pancreatic Trauma?
Source: Research Square preprint supplement (doi:10.21203/rs.3.rs-1217311/v1), 2022-01-03
Supplement: Supplementary file 1 [file 6a9f8b3d0267b34878be74b3.pdf]

**Figure S1.** Absolute standardized mean differences in raw, PSM, IPTW and OW model.

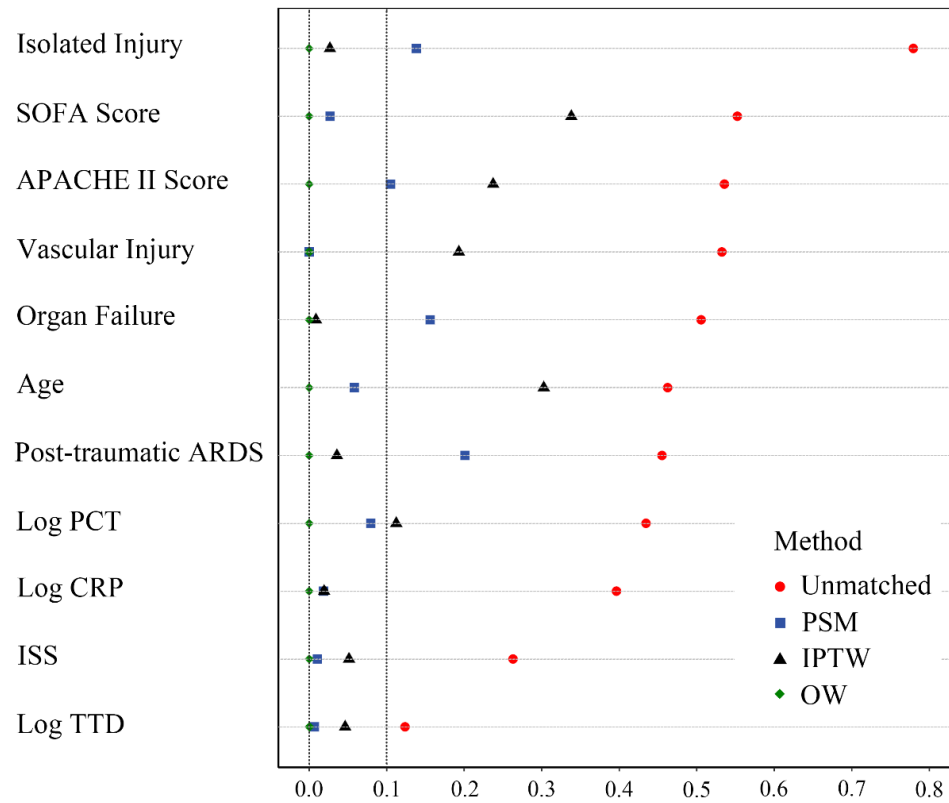

A SMD of less than 10% indicates appropriate balance. To correct for non-normal distribution, PCT, CRP, and TTD variables were log-transformed.
