# Supplementary material for: Open or Not Open the Retroperitoneum: A Pandora’s Box for High-grade Pancreatic Trauma?
Source: Research Square preprint supplement (doi:10.21203/rs.3.rs-1217311/v1), 2022-01-03
Supplement: Supplementary file 2 [file b44edb7533cba062f61c79c7.pdf]

**Table S2 :** The absolute SMD of baselines characteristics before and after propensity score matching or weighting.

|                                               | <b>Modified Poisson Regression</b>             |                       |                | <b>Propensity Score Matching</b> |                       |                |
|-----------------------------------------------|------------------------------------------------|-----------------------|----------------|----------------------------------|-----------------------|----------------|
| <b>Characteristic</b>                         | <b>LAP<br/>(N=90)</b>                          | <b>PCD<br/>(N=29)</b> | <b>SMD (%)</b> | <b>LAP<br/>(N=29)</b>            | <b>PCD<br/>(N=29)</b> | <b>SMD (%)</b> |
| Age(Years)                                    | 37.1±12.8                                      | 31.4±11.7             | 46.3           | 30.7±14.2                        | 31.4±11.7             | 5.8            |
| ISS                                           | 17.7±7.1                                       | 16.1±4.6              | 26.3           | 16.1±8.0                         | 16.1±4.6              | 1.1            |
| APACHE II Peak Score                          | 8.0±4.7                                        | 5.8±3.4               | 53.6           | 6.1±3.2                          | 5.8±3.4               | 10.5           |
| SOFA Peak Score                               | 3.4±2.8                                        | 2.2±1.2               | 55.2           | 2.2±1.3                          | 2.2±1.2               | 2.7            |
| Log(PCT)                                      | -0.1±1.9                                       | -0.8±1.5              | 43.5           | -0.96±1.6                        | -0.8±1.5              | 7.9            |
| Log(CRP)                                      | 4.5±1.0                                        | 4.0±1.3               | 39.6           | 4.0±1.3                          | 4.0±1.3               | 1.9            |
| Log(TTD)                                      | 2.9±1.3                                        | 3.1±1.8               | 12.4           | 3.1±1.3                          | 3.1±1.8               | 0.7            |
| Isolated pancreatic Injury, n (%)             |                                                |                       |                |                                  |                       |                |
| Yes                                           | 18(20.0%)                                      | 16(55.2%)             | 77.9           | 14(48.3%)                        | 16(55.2%)             | 13.8           |
| No                                            |                                                |                       |                |                                  |                       |                |
| Vascular Injury, n (%)                        |                                                |                       |                |                                  |                       |                |
| Yes                                           | 18(20.0%)                                      | 1(3.4%)               | 53.2           | 1(3.4%)                          | 1(3.4%)               | <0.1           |
| No                                            |                                                |                       |                |                                  |                       |                |
| Post-traumatic ARDS, n (%)                    |                                                |                       |                |                                  |                       |                |
| Yes                                           | 25(27.8%)                                      | 3(10.3%)              | 45.5           | 5(17.2%)                         | 3(10.3%)              | 20.1           |
| No                                            |                                                |                       |                |                                  |                       |                |
| Organ Failure before first intervention, n(%) |                                                |                       |                |                                  |                       |                |
| Yes                                           | 17(18.9%)                                      | 1(3.4%)               | 50.6           | 2(6.9%)                          | 1(3.4%)               | 15.6           |
| No                                            |                                                |                       |                |                                  |                       |                |
|                                               | <b>Inverse Probability Treatment Weighting</b> |                       |                | <b>Overlap Weighting</b>         |                       |                |

| Characteristic                                | LAP<br>(N=118.24) | PCD<br>(N=114.99) | SMD (%) | LAP<br>(N=17.79) | PCD<br>(N=17.79) | SMD (%) |
|-----------------------------------------------|-------------------|-------------------|---------|------------------|------------------|---------|
| Age(Years)                                    | 35.6±13.5         | 31.9±10.3         | 30.3    | 32.5±14.0        | 32.5±11.2        | <0.1    |
| ISS                                           | 17.3±6.9          | 17.0±4.9          | 5.1     | 16.6±6.6         | 16.6±4.9         | <0.1    |
| APACHE II Peak Score                          | 7.4±4.5           | 6.5±3.4           | 23.7    | 6.0±3.3          | 6.0±3.4          | <0.1    |
| SOFA Peak Score                               | 3.1±2.6           | 2.4±1.2           | 33.8    | 2.3±1.7          | 2.3±1.2          | <0.1    |
| Log (PCT) *                                   | -0.2±1.9          | -0.4±1.3          | 11.2    | -0.65±1.7        | -0.65±1.5        | <0.1    |
| Log (CRP) *                                   | 4.4±1.0           | 4.4±1.1           | 1.9     | 4.2±1.1          | 4.2±1.2          | <0.1    |
| Log (TTD) *                                   | 3.0±1.3           | 2.9±1.3           | 4.6     | 3.1±1.3          | 3.1±1.4          | <0.1    |
| Isolated pancreatic Injury, n(%)              |                   |                   |         |                  |                  |         |
| Yes                                           | 32.6(27.6%)       | 30.3(26.4%)       | 2.7     | 7.4(41.4%)       | 7.4(41.4%)       | <0.1    |
| No                                            |                   |                   |         |                  |                  |         |
| Vascular Injury, n(%)                         |                   |                   |         |                  |                  |         |
| Yes                                           | 19.0(16.1%)       | 11.1(9.6%)        | 19.3    | 0.9(5.1%)        | 0.9(5.1%)        | <0.1    |
| No                                            |                   |                   |         |                  |                  |         |
| Post-traumatic ARDS, n(%)                     |                   |                   |         |                  |                  |         |
| Yes                                           | 28.0(23.7%)       | 25.5(22.2%)       | 3.6     | 2.4(13.7%)       | 2.4(13.7%)       | <0.1    |
| No                                            |                   |                   |         |                  |                  |         |
| Organ failure before first intervention, n(%) |                   |                   |         |                  |                  |         |
| Yes                                           | 18.1(15.3%)       | 17.2(15.0%)       | 0.9     | 0.9(5.3%)        | 0.9(5.3%)        | <0.1    |
| No                                            |                   |                   |         |                  |                  |         |

\*To correct for non-normal distribution, PCT, CRP, and TTD variables were log-transformed.
