# Supplementary material for: Open or Not Open the Retroperitoneum: A Pandora’s Box for High-grade Pancreatic Trauma?
Source: Research Square preprint supplement (doi:10.21203/rs.3.rs-1217311/v1), 2022-01-03
Supplement: Supplementary file 3 [file c91898a90a7755b2db9a468b.pdf]

**Table S1:**Definitions of Outcomes.

| Outcomes                        | Definition                                                                                                                                                                      |
|---------------------------------|---------------------------------------------------------------------------------------------------------------------------------------------------------------------------------|
| New-onset organ failure         | Combination of new circulatory, respiratory, or renal failure                                                                                                                   |
| Circulatory failure             | Systolic blood pressure < 90 mmHg despite fluid resuscitation or new need for vasopressor support                                                                               |
| Respiratory failure             | PaO <sub>2</sub> < 60 mmHg or new postoperative ventilator requirement                                                                                                          |
| Renal failure                   | Creatinine > 2× preoperative value or new need for renal replacement therapy                                                                                                    |
| Hemorrhage                      | According to the International Study Group of Pancreatic Surgery (ISGPS)                                                                                                        |
| Pancreatic fistula              | According to the International Study Group of Pancreatic Fistula (ISGPF)                                                                                                        |
| Sepsis                          | According to the Sepsis-3.                                                                                                                                                      |
| Pancreatic pseudocyst           | Acute peripancreatic fluid collections becomes more organization and develops an enhanced non-epithelial wall on CECT.                                                          |
| Other gastrointestinal fistulas | Fistula occurs in the stomach, small intestine, colon, and biliary tract.                                                                                                       |
| Intra-abdominal abscess         | Infection is localized, enveloping, and fluid foci with or without gas can be seen on imaging.                                                                                  |
| IAH/ACS                         | Intra-abdominal pressure greater than 12mmHg are considered to represent IAH, and the pressure >20mmHg in the context of new-onset organ dysfunction/failure is considered ACS. |
| LOS                             | Total postoperative LOS, including all related readmissions.                                                                                                                    |

CECT, Contrast-Enhanced CT; IAH, intra-abdominal hypertension; ACS, abdominal compartment syndrome; LOS, Length of Stay.
